# Supplementary material for: Functional Diversity and Evolution of Bitter Taste Receptors in Egg-Laying Mammals
Source: Oxford University Press journal article supplement (doi:10.1093/molbev/msac107), 2022-05-31
Supplement: msac107_supplementary_data.pdf [file msac107_supplementary_data.pdf]

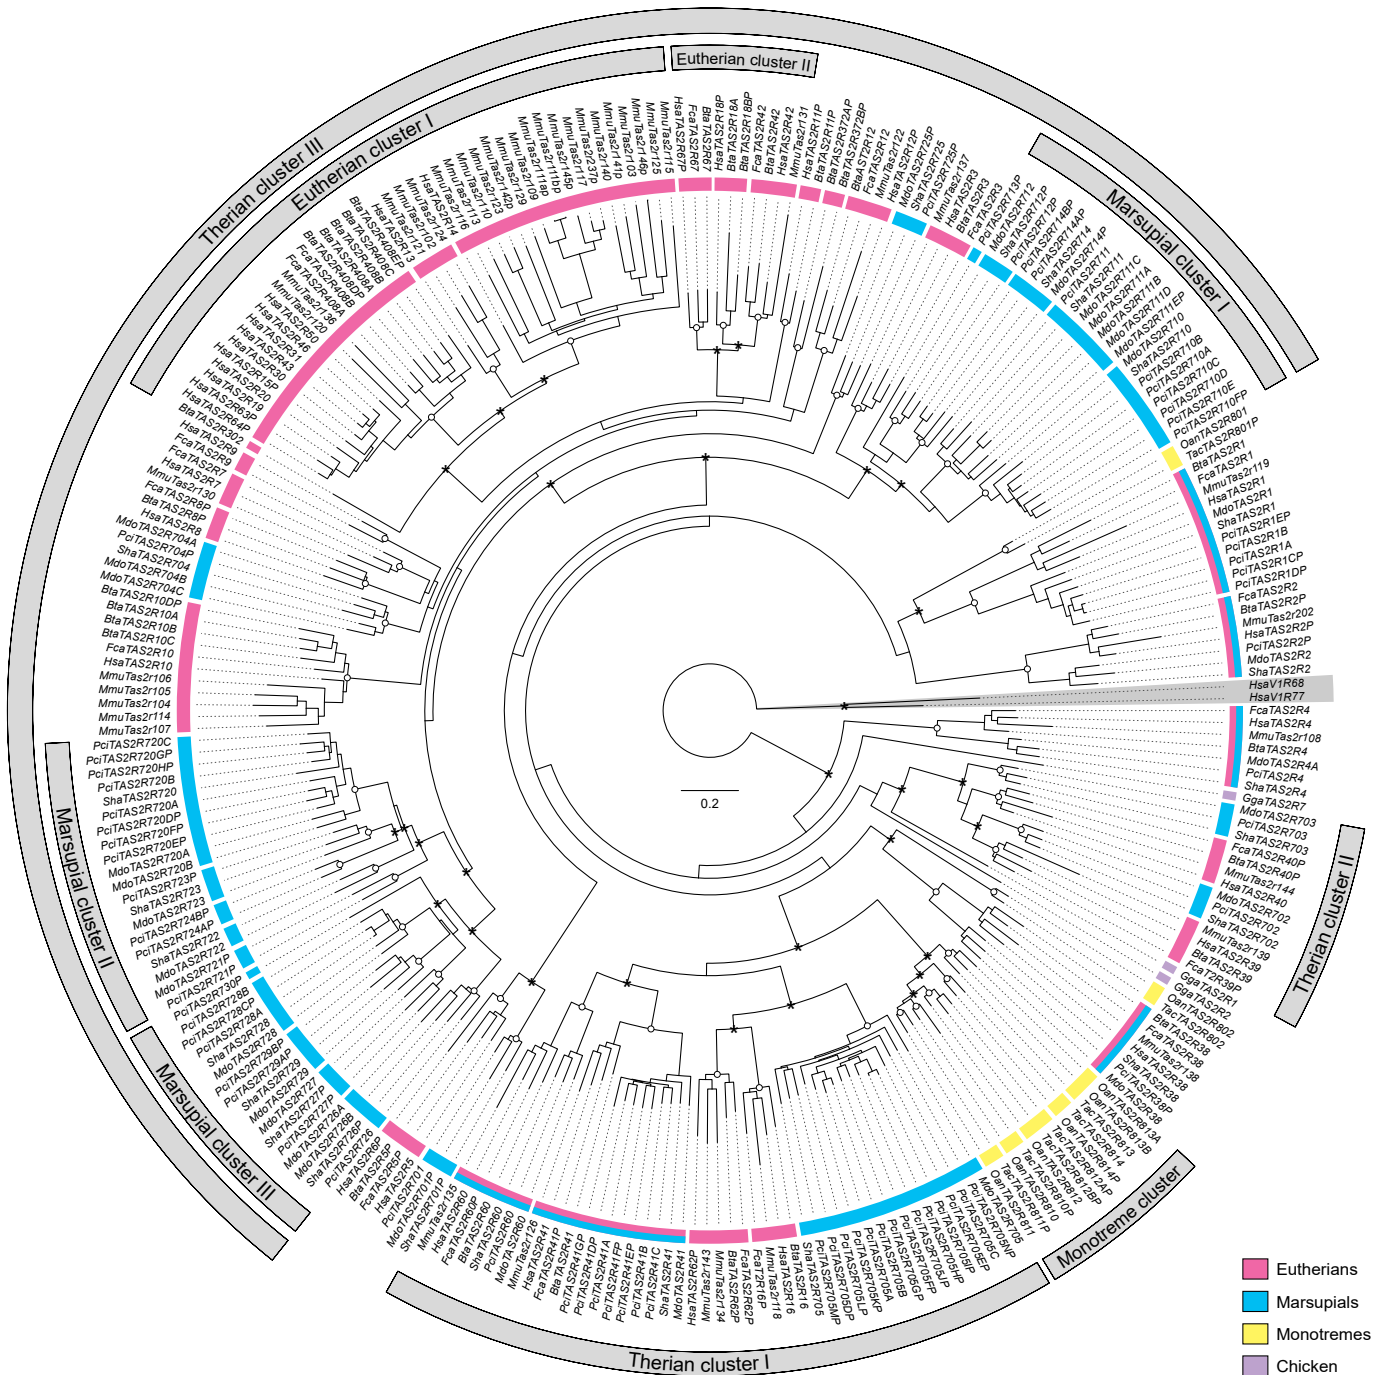

**Figure S1** The maximum-likelihood tree of mammalian *TAS2R* genes.

All the mammalian *TAS2R* gene clusters identified in the platypus and echidna genome project (Zhou *et al.* 2021) were confirmed in this tree. Human *VIR68* and *VIR77* were used as outgroups. The nodes of each orthologous gene group are marked as open circles (supported by  $\geq 95\%$  bootstrap values). The nodes connecting orthologous gene groups with  $\geq 70\%$  bootstrap values are marked as asterisks. Species abbreviations are as follows; *Oan*: platypus; *Tac*: echidna; *Hsa*: human; *Mmu*: mouse; *Bta*: cattle; *Fca*: domestic cat; *Mdo*: opossum; *Sha*: Tasmanian devil; *Pci*: koala; *Gga*: chicken.

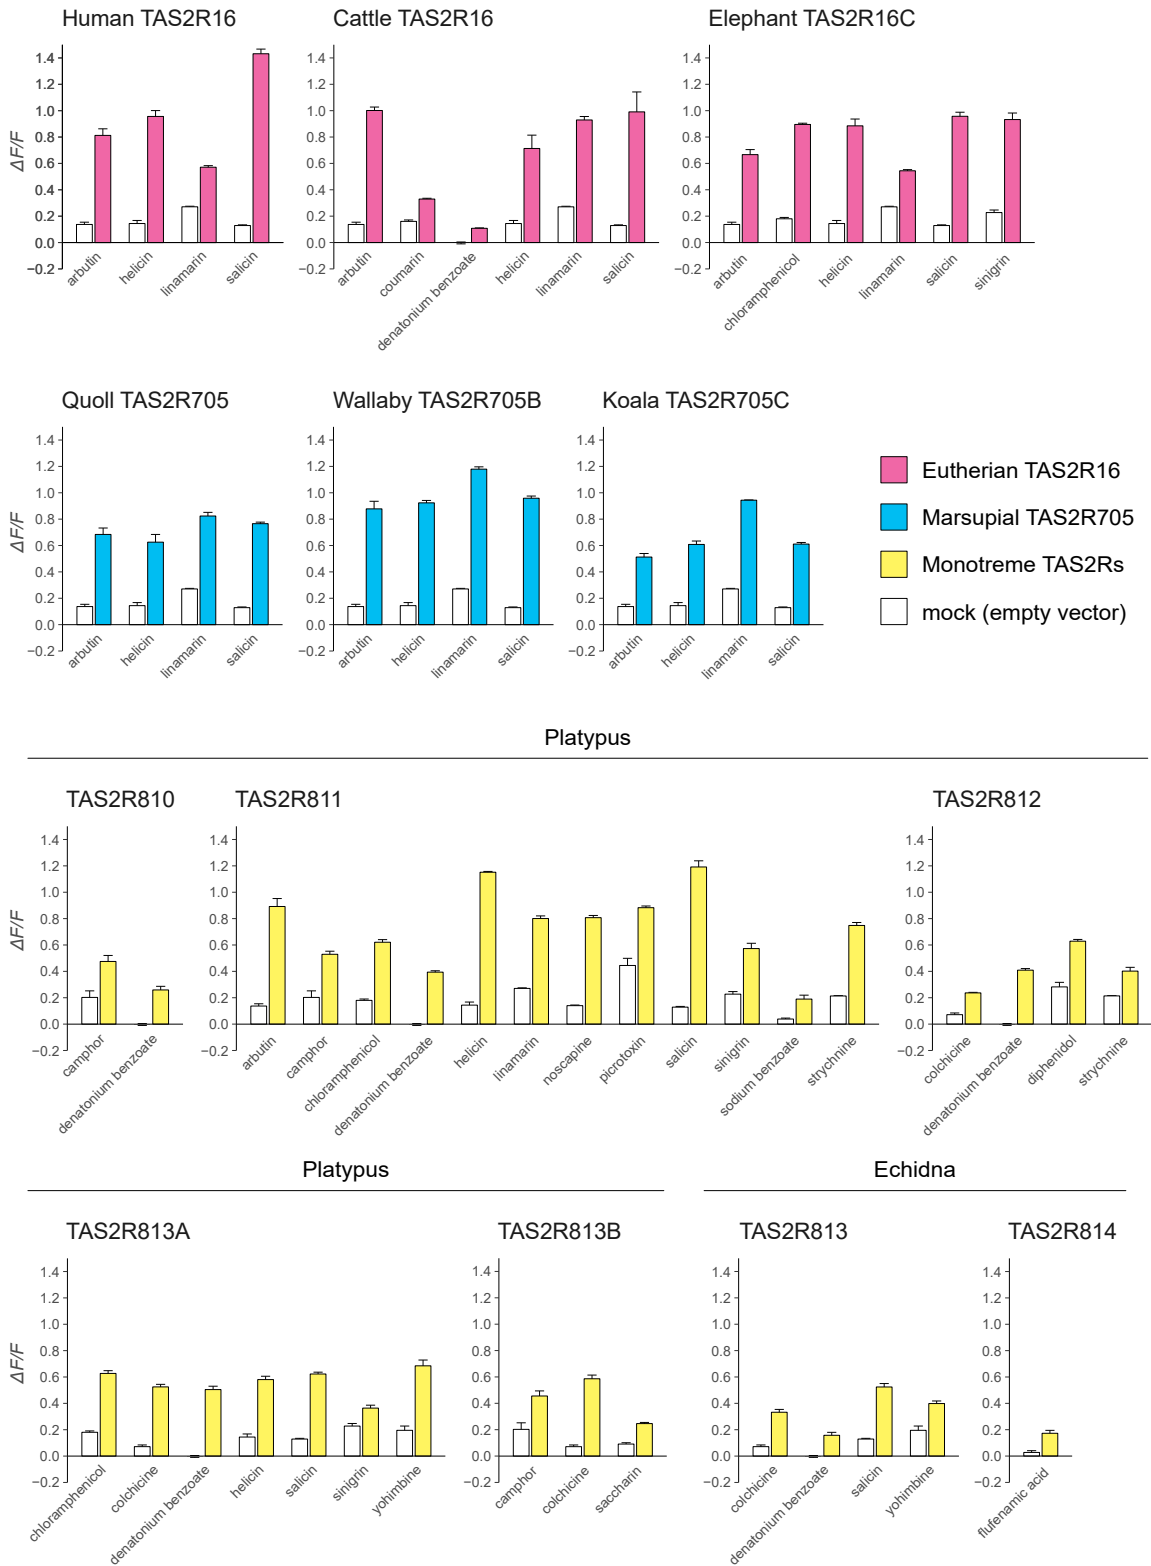

**Figure S2 Responses of TAS2Rs to the identified agonists.**

The ligand-receptor pairs that TAS2R-expressing cells showed significantly higher responses than mock-transfected cells (Dunnett's test,  $p < 0.01$ ) are visualized ( $n = 3-5$ ).

**Table S1 Whole genome assemblies used in this study**

| Species                         | Assembly         | Reference <sup>1</sup>    |
|---------------------------------|------------------|---------------------------|
| <i>Homo sapiens</i>             | GRCh38.p13       | Schneider et al., 2017    |
| <i>Mus musculus</i>             | GRCm39           | MGSC 2002                 |
| <i>Bos taurus</i>               | ARS-UCD1.2       | Rosen et al., 2020        |
| <i>Felis catus</i>              | Felis_catus_9.0  | Buckley et al., 2020      |
| <i>Loxodonta africana</i>       | LoxAfr3.0        | Lindblad-Toh et al., 2011 |
| <i>Echinops telfairi</i>        | ASM31398v2       | Zoonomia Consortium 2020  |
| <i>Dasyurus novemcinctus</i>    | dasNov3          | Lindblad-Toh et al., 2011 |
| <i>Monodelphis domestica</i>    | MonDom5          | Mikkelsen et al., 2007    |
| <i>Sarcophilus harrisi</i>      | Devil_ref v7.0   | Murchison et al., 2012    |
| <i>Phascolarctos cinereus</i>   | phaCin_unsw_v4.1 | Johnson et al., 2018      |
| <i>Ornithorhynchus anatinus</i> | mOrnAna1.pri.v4  | Zhou et al., 2021         |
| <i>Tachyglossus aculeatus</i>   | mTacAcu1.pri     | Zhou et al., 2021         |
| <i>Gallus gallus</i>            | GRCg6a           | ICGSC 2004                |

<sup>1</sup> MGSC: Mouse Genome Sequencing Consortium; ICGSC: International Chicken Genome Sequencing Consortium.

**Table S2 Localization of TAS2Rs and their adjacent genes.**

| Species             | Gene                          | Location                         | Strand |
|---------------------|-------------------------------|----------------------------------|--------|
| <i>Homo sapiens</i> | <b>TAS2R16</b>                | NC_000007.14:122994759-122995634 | -      |
|                     | <b>TAS2R62P</b>               | NC_000007.14:143437029-143437973 | +      |
|                     | <b>TAS2R60</b>                | NC_000007.14:143443453-143444409 | +      |
|                     | <b>TAS2R41</b>                | NC_000007.14:143477873-143478796 | +      |
|                     | <i>AASS</i>                   | NC_000007.14:122073544-122144269 | -      |
|                     | <i>CADPS2</i>                 | NC_000007.14:122318411-122886500 | -      |
|                     | <i>SLC13A1</i>                | NC_000007.14:123113490-123201836 | -      |
|                     | <i>GSTK1</i>                  | NC_000007.14:143263441-143269115 | +      |
|                     | <i>CLCN1</i>                  | NC_000007.14:143316111-143352083 | +      |
|                     | <i>ZYX</i>                    | NC_000007.14:143381345-143391111 | +      |
|                     | <i>EPHA1</i>                  | NC_000007.14:143391129-143408856 | -      |
|                     | <i>ARHGEF5</i>                | NC_000007.14:144355396-144380632 | +      |
|                     | <i>NOBOX</i>                  | NC_000007.14:144396805-144410422 | -      |
| <i>Mus musculus</i> | <b>Tas2r118</b>               | NC_000072.7:23969160-23970059    | -      |
|                     | <b>Tas2r143</b>               | NC_000072.7:42377172-42378053    | +      |
|                     | <b>Tas2r134</b>               | NC_000068.8:51517523-51518419    | +      |
|                     | <b>Tas2r135</b>               | NC_000072.7:42382490-42383428    | +      |
|                     | <b>Tas2r126</b>               | NC_000072.7:42411469-42412395    | +      |
|                     | <i>Aass</i>                   | NC_000072.7:23072172-23132985    | -      |
|                     | <i>Cadps2</i>                 | NC_000072.7:23262772-23840662    | -      |
|                     | <i>Slc13a1</i>                | NC_000072.7:24088282-24168118    | -      |
|                     | <i>Gstk1</i>                  | NC_000072.7:42222869-42227375    | +      |
|                     | <i>Cln1</i>                   | NC_000072.7:42263552-42292698    | +      |
|                     | <i>Zyx</i>                    | NC_000072.7:42326491-42337147    | +      |
|                     | <i>Epha1</i>                  | NC_000072.7:42335421-42350249    | -      |
|                     | <i>Arhgef5</i>                | NC_000072.7:43242578-43266254    | +      |
| <i>Nobox</i>        | NC_000072.7:43280608-43287006 | -                                |        |
| <i>Bos taurus</i>   | <b>TAS2R16</b>                | NC_037331.1:87407411-87408316    | -      |
|                     | <b>TAS2R62P</b>               | NC_037331.1:106839855-106840765  | +      |
|                     | <b>TAS2R60</b>                | NC_037331.1:106849766-106850704  | +      |
|                     | <b>TAS2R41</b>                | NC_037331.1:106880013-106880906  | +      |
|                     | <i>AASS</i>                   | NC_037331.1:86512542-86594714    | -      |
|                     | <i>CADPS2</i>                 | NC_037331.1:86734466-87314884    | -      |
|                     | <i>SLC13A1</i>                | NC_037331.1:87464061-87568141    | -      |
|                     | <i>GSTK1</i>                  | NC_037331.1:106650764-106657919  | +      |
|                     | <i>CLCN1</i>                  | NC_037331.1:106700961-106737587  | +      |

|                           |                         |                                  |   |
|---------------------------|-------------------------|----------------------------------|---|
|                           | <i>ZYX</i>              | NC_037331.1:106775739-106788378  | + |
|                           | <i>EPHA1</i>            | NC_037331.1:106788864-106804343  | - |
|                           | <i>ARHGEF5</i>          | NC_037331.1:107620234-107651352  | + |
|                           | <i>NOBOX</i>            | NC_037331.1:107664889-107671402  | - |
| <i>Felis catus</i>        | <b><i>TAS2R16P</i></b>  | NC_018724.3:142107645-142108538  | - |
|                           | <b><i>TAS2R62P</i></b>  | NC_018724.3:159082588-159083513  | + |
|                           | <b><i>TAS2R60P</i></b>  | NC_018724.3:159088520-159898445  | + |
|                           | <b><i>TAS2R41P</i></b>  | NC_018724.3:159113519-159114530  | + |
|                           | <i>AASS</i>             | NC_018724.3:141280711-141341987  | - |
|                           | <i>CADPS2</i>           | NC_018724.3:141473723-142022845  | - |
|                           | <i>SLC13A1</i>          | NC_018724.3:142159403-142300225  | - |
|                           | <i>GSTK1</i>            | NC_018724.3:158920615-158925017  | + |
|                           | <i>CLCN1</i>            | NC_018724.3:158963698-158995074  | + |
|                           | <i>ZYX</i>              | NC_018724.3:159030296-159039202  | + |
|                           | <i>EPHA1</i>            | NC_018724.3:159039378-159055821  | - |
|                           | <i>ARHGEF5</i>          | NC_018724.3:159676765-159700188  | + |
|                           | <i>NOBOX</i>            | NC_018724.3:159709505-159723783  | - |
| <i>Loxodonta africana</i> | <b><i>TAS2R16AP</i></b> | NW_003573425.1:92807283-92808198 | - |
|                           | <b><i>TAS2R16BP</i></b> | NW_003573425.1:92823476-92824492 | - |
|                           | <b><i>TAS2R16C</i></b>  | NW_003573425.1:92839824-92840705 | - |
|                           | <b><i>TAS2R62AP</i></b> | NW_003573511.1:5351128-5351896   | - |
|                           | <b><i>TAS2R62B</i></b>  | NW_003573511.1:5408091-5409017   | - |
|                           | <b><i>TAS2R62C</i></b>  | NW_003573592.1:64061-65029       | - |
|                           | <b><i>TAS2R62D</i></b>  | NW_003573592.1:77090-78016       | - |
|                           | <b><i>TAS2R62EP</i></b> | NW_003573592.1:92082-92942       | - |
|                           | <b><i>TAS2R62F</i></b>  | NW_003573592.1:109269-110249     | - |
|                           | <b><i>TAS2R60P</i></b>  | NW_003573592.1:46739-47643       | - |
|                           | <b><i>TAS2R41</i></b>   | NW_003573592.1:22267-23193       | - |
|                           | <i>AASS</i>             | NW_003573425.1:91897617-91946638 | - |
|                           | <i>CADPS2</i>           | NW_003573425.1:92073932-92686085 | - |
|                           | <i>SLC13A1</i>          | NW_003573425.1:92960950-93033713 | - |
|                           | <i>GSTK1</i>            | NW_003573592.1:304157-312773     | - |
|                           | <i>CLCN1</i>            | NW_003573592.1:221031-256464     | - |
|                           | <i>ZYX</i>              | NW_003573592.1:160502-163672     | - |
|                           | <i>EPHA1</i>            | NW_003573592.1:144292-160069     | + |
|                           | <i>ARHGEF5</i>          | NW_003573511.1:4886377-4916802   | - |
|                           | <i>NOBOX</i>            | NW_003573511.1:4869381-4873222   | + |
| <i>Echinops telfairi</i>  | <b><i>TAS2R16</i></b>   | NW_022103920.1:22492917-22493816 | + |

|                              |                 |                                  |   |
|------------------------------|-----------------|----------------------------------|---|
|                              | <b>TAS2R60</b>  | NW_022103920.1:4180458-4181381   | - |
|                              | <b>TAS2R41</b>  | NW_022103920.1:4156860-4157786   | - |
|                              | <i>AASS</i>     | NW_022103920.1:23298673-23349431 | + |
|                              | <i>CADPS2</i>   | NW_022103920.1:22758009-23140073 | + |
|                              | <i>SLC13A1</i>  | NW_022103920.1:22239486-22339469 | + |
|                              | <i>GSTK1</i>    | NW_022103920.1:4331396-4340160   | - |
|                              | <i>CLCN1</i>    | NW_022103920.1:4283326-4305714   | - |
|                              | <i>ZYX</i>      | NW_022103920.1:4231912-4236636   | - |
|                              | <i>EPHA1</i>    | NW_022103920.1:4221368-4230998   | + |
|                              | <i>ARHGEF5</i>  | NW_022103920.1:3334725-3351326   | - |
|                              | <i>NOBOX</i>    | NW_022103920.1:3306873-3321536   | + |
| <i>Dasypus novemcinctus</i>  | <b>TAS2R16P</b> | NW_004474648.1:506090-506841     | - |
|                              | <b>TAS2R62P</b> | NW_004487253.1:580420-581281     | + |
|                              | <b>TAS2R60P</b> | NW_004487253.1:584749-585687     | + |
|                              | <b>TAS2R41</b>  | NW_004487253.1:612849-613775     | + |
|                              | <i>AASS</i>     | NW_004501360.1:576833-658124     | + |
|                              | <i>CADPS2*</i>  | NW_04474548.1:662323-897106      | + |
|                              |                 | NW_004501360.1:8138-371315       | + |
|                              | <i>SLC13A1</i>  | NW_004474648.1:251754-357200     | + |
|                              | <i>GSTK1</i>    | NW_004487253.1:394086-399174     | + |
|                              | <i>CLCN1</i>    | NW_004487253.1:453990-492055     | + |
|                              | <i>ZYX</i>      | NW_004487253.1:523531-532663     | + |
|                              | <i>EPHA1</i>    | NW_004487253.1:532743-548607     | - |
|                              | <i>ARHGEF5</i>  | NW_004480844.1:479836-502679     | - |
|                              | <i>NOBOX</i>    | NW_004480844.1:450909-464185     | - |
| <i>Monodelphis domestica</i> | <b>TAS2R60</b>  | NC_008808.1:206393608-206394525  | + |
|                              | <b>TAS2R705</b> | NC_008808.1:206525193-206526095  | + |
|                              | <b>TAS2R41</b>  | NC_008808.1:206551235-206552182  | + |
|                              | <i>AASS</i>     | NC_008808.1:179731018-179804769  | - |
|                              | <i>CADPS2</i>   | NC_008808.1:179991087-180731039  | - |
|                              | <i>SLC13A1</i>  | NC_008808.1:181009440-181114783  | - |
|                              | <i>GSTK1</i>    | NC_008808.1:20625076-206256965   | + |
|                              | <i>CLCN1</i>    | NC_008808.1:206340753-206377043  | + |
|                              | <i>ZYX</i>      | NC_008808.1:206464913-206474234  | + |
|                              | <i>EPHA1</i>    | NC_008808.1:206474453-206494286  | - |
|                              | <i>ARHGEF5</i>  | NC_008808.1:207268953-207329995  | + |
|                              | <i>NOBOX</i>    | NC_008808.1:207444632-207451867  | - |
| <i>Sarcophilus harrisii</i>  | <b>TAS2R60</b>  | NW_003843673.1:192001-192912     | + |

|                               |                   |                                |   |
|-------------------------------|-------------------|--------------------------------|---|
|                               | <b>TAS2R705</b>   | NW_003843673.1:357999-358898   | + |
|                               | <b>TAS2R41</b>    | NW_003843673.1:339939-340883   | + |
|                               | <i>AASS</i>       | NW_003843660.1:2594381-2659468 | - |
|                               | <i>CADPS2</i>     | NW_003843661.1:35110-586011    | - |
|                               | <i>SLC13A1</i>    | NW_003843662.1:15400-95809     | - |
|                               | <i>GSTK1</i>      | NW_003843673.1:84009-89226     | + |
|                               | <i>CLCN1</i>      | NW_003843673.1:138615-174265   | + |
|                               | <i>ZYX</i>        | NW_003843673.1:251173-259934   | + |
|                               | <i>EPHA1</i>      | NW_003843673.1:259714-279781   | - |
|                               | <i>ARHGEF5</i>    | NW_003843673.1:1054905-1082042 | + |
|                               | <i>NOBOX</i>      | NW_003843673.1:1270754-1276133 | - |
| <i>Phascolarctos cinereus</i> | <b>TAS2R60</b>    | NW_018344022.1:8316685-8317626 | + |
|                               | <b>TAS2R705A</b>  | NW_018344022.1:8540416-8541318 | + |
|                               | <b>TAS2R705B</b>  | NW_018344022.1:8581667-8582560 | + |
|                               | <b>TAS2R705C</b>  | NW_018344022.1:8819995-8820903 | + |
|                               | <b>TAS2R705DP</b> | NW_018344022.1:8431864-8432867 | - |
|                               | <b>TAS2R705EP</b> | NW_018344022.1:8490256-8491195 | + |
|                               | <b>TAS2R705FP</b> | NW_018344022.1:8518197-8519267 | - |
|                               | <b>TAS2R705GP</b> | NW_018344022.1:8528503-8529422 | + |
|                               | <b>TAS2R705HP</b> | NW_018344022.1:8548204-8549169 | + |
|                               | <b>TAS2R705IP</b> | NW_018344022.1:8569934-8570840 | + |
|                               | <b>TAS2R705JP</b> | NW_018344022.1:8624230-8625169 | + |
|                               | <b>TAS2R705KP</b> | NW_018344022.1:8653984-8654964 | + |
|                               | <b>TAS2R705LP</b> | NW_018344022.1:8699145-8700106 | + |
|                               | <b>TAS2R705MP</b> | NW_018344022.1:8740997-8741921 | + |
|                               | <b>TAS2R705NP</b> | NW_018344022.1:8772735-8773698 | + |
|                               | <b>TAS2R41A</b>   | NW_018344022.1:8457114-8458043 | + |
|                               | <b>TAS2R41B</b>   | NW_018344022.1:8670223-8671242 | + |
|                               | <b>TAS2R41C</b>   | NW_018344022.1:8799763-8800710 | + |
|                               | <b>TAS2R41DP</b>  | NW_018344022.1:8591556-8592550 | + |
|                               | <b>TAS2R41EP</b>  | NW_018344022.1:8713039-8714104 | + |
|                               | <b>TAS2R41FP</b>  | NW_018344022.1:8849104-8850095 | + |
|                               | <b>TAS2R41GP</b>  | NW_018344022.1:8865547-8866552 | + |
|                               | <i>AASS</i>       | NW_018344118.1:3190171-3257650 | - |
|                               | <i>CADPS2</i>     | NW_018344118.1:3425919-4134012 | - |
|                               | <i>SLC13A1</i>    | NW_018344118.1:4369571-4480193 | - |
|                               | <i>GSTK1</i>      | NW_018344022.1:8169926-8184999 | + |
|                               | <i>CLCN1</i>      | NW_018344022.1:8262629-8298276 | + |

|                                 |                          |                                  |   |
|---------------------------------|--------------------------|----------------------------------|---|
|                                 | <i>ZYX</i>               | NW_018344022.1:8378140-8388076   | + |
|                                 | <i>EPHA1</i>             | NW_018344022.1:8388307-8407479   | - |
|                                 | <i>ARHGEF5</i>           | NW_018344022.1:9484469-9511895   | + |
|                                 | <i>NOBOX</i>             | NW_018344022.1:9679198-9683747   | - |
| <i>Ornithorhynchus anatinus</i> | <b><i>TAS2R810</i></b>   | NC_041740.1:37671841-37672764    | - |
|                                 | <b><i>TAS2R811</i></b>   | NC_041740.1:37668077-37669000    | - |
|                                 | <b><i>TAS2R812</i></b>   | NC_041740.1:37663987-37664898    | - |
|                                 | <b><i>TAS2R813A</i></b>  | NC_041740.1:37666009-37666935    | - |
|                                 | <b><i>TAS2R813B</i></b>  | NC_041740.1:37661984-37662910    | - |
|                                 | <b><i>TAS2R814P</i></b>  | NC_041740.1:37660283-37661126    | - |
|                                 | <i>AASS</i>              | NC_041737.1:42596806-42640560    | - |
|                                 | <i>CADPS2</i>            | NC_041737.1:42720031-43091041    | - |
|                                 | <i>SLC13A1</i>           | NC_041737.1:43179512-43233468    | - |
|                                 | <i>GSTK1</i>             | NC_041740.1:37544130-37547561    | + |
|                                 | <i>CLCN1</i>             | NC_041740.1:37594471-37612012    | + |
|                                 | <i>ZYX</i>               | NC_041740.1:37628065-37634099    | + |
|                                 | <i>EPHA1</i>             | NC_041740.1:37634174-37645439    | - |
|                                 | <i>ARHGEF5</i>           | NC_041740.1:37818542-37835225    | + |
|                                 | <i>NOBOX</i>             | NC_041740.1:37835947-37839865    | - |
| <i>Tachyglossus aculeatus</i>   | <b><i>TAS2R810P</i></b>  | NW_024044828.1:16466072-16467195 | - |
|                                 | <b><i>TAS2R811P</i></b>  | NW_024044828.1:16463630-16464553 | - |
|                                 | <b><i>TAS2R812AP</i></b> | NW_024044828.1:16461219-16462129 | - |
|                                 | <b><i>TAS2R812BP</i></b> | NW_024044828.1:16457601-16458129 | - |
|                                 | <b><i>TAS2R813</i></b>   | NW_024044828.1:16459202-16460131 | - |
|                                 | <b><i>TAS2R814</i></b>   | NW_024044828.1:16455258-16456184 | - |
|                                 | <i>AASS</i>              | NC_052075.1:39145291-39190568    | - |
|                                 | <i>CADPS2</i>            | NC_052075.1:39276361-39647815    | - |
|                                 | <i>SLC13A1</i>           | NC_052075.1:39749097-39838869    | - |
|                                 | <i>GSTK1</i>             | NW_024044828.1:16322504-16326426 | + |
|                                 | <i>CLCN1</i>             | NW_024044828.1:16379779-16397591 | + |
|                                 | <i>ZYX</i>               | NW_024044828.1:16418956-16425027 | + |
|                                 | <i>EPHA1</i>             | NW_024044828.1:16425139-16436641 | - |
|                                 | <i>ARHGEF5</i>           | NW_024044828.1:16602677-16629480 | + |
|                                 | <i>NOBOX</i>             | NW_024044828.1:16630100-16644680 | - |
| <i>Gallus gallus</i>            | <b><i>TAS2R1</i></b>     | NC_006088.5:78481425-78482360    | - |
|                                 | <b><i>TAS2R2</i></b>     | NC_006088.5:192365090-192366025  | + |
|                                 | <b><i>TAS2R7</i></b>     | NC_006090.5:109851221-109852186  | - |
|                                 | <i>AASS</i>              | NC_006088.5:23007392-23039846    | + |



|                |                               |   |
|----------------|-------------------------------|---|
| <i>CADPS2</i>  | NC_006088.5:22670262-22972029 | + |
| <i>SLC13A1</i> | NC_006088.5:22565946-22594889 | + |
| <i>GSTK1</i>   | NC_006088.5:78425551-78436579 | - |
| <i>CLCN1</i>   | NC_006088.5:78261760-78334112 | - |
| <i>ZYX</i>     | NC_006088.5:78201043-78231480 | - |
| <i>EPHA1</i>   | NC_006088.5:78162527-78195974 | + |
| <i>ARHGEF5</i> | NC_006088.5:74766817-74802789 | - |
| <i>NOBOX</i>   | NC_006088.5:74745799-74766293 | - |

---

\**CADPS2* of armadillo is separated into the two scaffolds. Its former part is in NW\_004474648.1 and the latter is in NW\_004501360.1.

**Table S3 Compound library for the agonist screening assay**

| Compound            | Vender <sup>1</sup>  | Activated human TAS2Rs                                  | N/S <sup>2</sup> | Tested conc. (mM) |
|---------------------|----------------------|---------------------------------------------------------|------------------|-------------------|
| Acesulfame K        | WPCI                 | 43, 31                                                  | S                | 10                |
| <b>Arbutin</b>      | Sigma-Aldrich        | 16                                                      | N                | 10                |
| Caffeine            | WPCI                 | 7, 10, 14, 43, 46                                       | N                | 1                 |
| Camphor             | WPCI                 | 4, 10, 14, 30                                           | N                | 1                 |
| Chloramphenicol     | WPCI                 | 1, 8, 10, 39, 41, 43, 46                                | N                | 1                 |
| Colchicine          | Sigma-Aldrich        | 4, 39, 46                                               | N                | 10                |
| Coumarin            | Sigma-Aldrich        | 10, 14                                                  | N                | 0.3               |
| Denatonium benzoate | WPCI                 | 4, 8, 10, 13, 39, 43, 46, 30                            | S                | 3                 |
| Diphenidol          | WPCI                 | 1, 4, 7, 10, 13, 14, 16, 38, 39, 40, 43, 31, 46, 30, 20 | S                | 0.1               |
| Flufenamic acid     | Sigma-Aldrich        | 14                                                      | S                | 0.03              |
| <b>Helicin</b>      | TCI                  | 16, 43                                                  | N                | 10                |
| <b>Linamarin</b>    | SBC                  | 16                                                      | N                | 20                |
| Noscapine           | Sigma-Aldrich        | 14                                                      | N                | 0.01              |
| PTC                 | Sigma-Aldrich        | 38                                                      | S                | 0.1               |
| Picrotoxin          | WPCI                 | 1, 10, 14, 46, 30 (Picrotoxinin)                        | N                | 1                 |
| Quinine HCl         | Mylan                | 4, 7, 10, 14, 39, 40, 43, 31, 46                        | N                | 0.01              |
| Saccharin           | WPCI                 | 8, 43, 31                                               | S                | 10                |
| <b>Salicin</b>      | Sigma-Aldrich        | 16                                                      | N                | 40                |
| <b>Sinigrin</b>     | Extrasynthese        | 16, 38                                                  | N                | 1                 |
| Sodium benzoate     | Nacalai Tesque, Inc. | 14, 16                                                  | S                | 10                |
| Sodium thiocyanate  | WPCI                 | 1, 38                                                   | S                | 3                 |
| Strychnine          | Sigma-Aldrich        | 7, 10, 46                                               | N                | 0.03              |
| Thiamine HCl        | WPCI                 | 1, 39                                                   | N                | 1                 |
| Yohimbine           | WPCI                 | 1, 4, 10, 38, 46                                        | N                | 0.3               |

<sup>1</sup>: WPCI: Wako Pure Chemical Industries, Ltd.; TCI: Tokyo Chemical Industry Co, Ltd.; SBC: Santa Cruz Biotechnology

<sup>2</sup>: N: natural compounds; S: synthetic compounds

**Table S4 The amino acid residues, which affect the activation of human TAS2R16, in tested mammalian receptors**

| Domain                             | TM2 |    |    |    | TM3 |    |    |    |    |    | TM5 |     |     | TM6 |     |     | TM7 |     |     |     |     |
|------------------------------------|-----|----|----|----|-----|----|----|----|----|----|-----|-----|-----|-----|-----|-----|-----|-----|-----|-----|-----|
| BW numbering (GPCRdb)              | 53  | 57 | 60 | 61 | 32  | 33 | 35 | 36 | 39 | 40 | 39  | 43  | 48  | 51  | 52  | 55  | 39  | 42  | 43  | 45  | 46  |
| Position in the multiple alignment | 59  | 63 | 66 | 67 | 90  | 91 | 93 | 94 | 97 | 98 | 183 | 187 | 245 | 248 | 249 | 252 | 273 | 276 | 277 | 279 | 280 |
| HumanTAS2R16                       | L   | S  | N  | N  | W   | E  | F  | N  | T  | F  | Q   | H   | F   | Y   | F   | I   | E   | V   | Y   | F   | I   |
| CattleTAS2R16                      | Q   | .  | Y  | .  | .   | .  | T  | .  | S  | .  | S   | K   | .   | .   | .   | V   | .   | I   | .   | L   | V   |
| ElephantTAS2R16C                   | R   | .  | Y  | .  | .   | D  | A  | .  | .  | .  | S   | Q   | .   | .   | .   | L   | .   | I   | .   | V   | S   |
| OpossumTAS2R705                    | .   | .  | S  | .  | .   | T  | S  | .  | .  | .  | F   | Q   | Y   | .   | .   | L   | .   | T   | .   | G   | .   |
| DevilTAS2R705                      | .   | A  | S  | D  | .   | N  | P  | .  | .  | .  | F   | Q   | .   | .   | L   | L   | .   | T   | .   | G   | .   |
| QuollTAS2R705                      | .   | A  | S  | D  | .   | N  | P  | .  | .  | .  | F   | Q   | .   | .   | L   | L   | .   | T   | .   | G   | .   |
| KoalaTAS2R705C                     | .   | A  | .  | D  | .   | N  | T  | .  | .  | .  | F   | Q   | C   | .   | V   | L   | .   | T   | .   | S   | L   |
| WallabyTAS2R705B                   | .   | A  | S  | .  | .   | S  | T  | .  | .  | .  | L   | Q   | C   | .   | V   | L   | .   | T   | .   | G   | .   |
| PlatypusTAS2R810                   | M   | .  | .  | G  | .   | I  | L  | .  | S  | .  | I   | I   | Y   | .   | .   | L   | Q   | S   | F   | G   | T   |
| PlatypusTAS2R811                   | .   | .  | .  | G  | .   | A  | L  | .  | S  | .  | I   | I   | Y   | .   | .   | L   | Q   | T   | F   | G   | T   |
| PlatypusTAS2R812                   | .   | .  | .  | G  | .   | D  | L  | .  | S  | .  | V   | I   | Y   | .   | .   | L   | Q   | T   | F   | G   | T   |
| PlatypusTAS2R813A                  | .   | A  | .  | G  | G   | V  | L  | G  | S  | .  | I   | T   | Y   | .   | .   | L   | Q   | T   | .   | G   | P   |
| PlatypusTAS2R813B                  | .   | A  | .  | G  | A   | A  | L  | T  | S  | .  | I   | T   | Y   | .   | .   | L   | Q   | T   | .   | G   | P   |
| EchidnaTAS2R813                    | .   | A  | .  | G  | G   | A  | L  | S  | S  | .  | I   | T   | Y   | .   | .   | L   | Q   | T   | .   | G   | P   |
| EchidnaTAS2R814                    | .   | .  | I  | G  | .   | I  | L  | T  | S  | .  | V   | M   | Y   | H   | .   | L   | Q   | T   | F   | G   | L   |
| <b>Sakurai et al., 2010</b>        |     |    |    |    |     | ✓  |    | ✓  |    | ✓  | ✓   | ✓   |     |     | ✓   | ✓   |     |     |     |     |     |
| <b>Thomas et al., 2017</b>         | ✓   |    |    |    | ✓   |    | ✓  | ✓  |    | ✓  |     |     | ✓   |     |     | ✓   | ✓   | ✓   | ✓   |     |     |
| <b>Fierro et al., 2019</b>         | ✓   | ✓  | ✓  | ✓  | ✓   | ✓  | ✓  | ✓  | ✓  | ✓  | ✓   | ✓   | ✓   | ✓   | ✓   | ✓   | ✓   | ✓   | ✓   | ✓   | ✓   |

Each coloration in amino acid positions shows how they affect TAS2R activation reported in Fierro et al., 2019. Orange and blue: ligand binding related to glucose moiety and aglycons, respectively; grey: ligand binding in specific ligands; white: formation of binding cavity. The check marks (✓) indicate the positions reported as the sites responsible for TAS2R16 activation in the paper.

## Data set S1 Nucleotide sequences of TAS2Rs tested in the functional assays

>humanTAS2R16

ATGATACCCATCCAACTCACTGTCTTCTTCATGATCATCTATGTGCTTGAGTCCTTGACA  
ATTATTGTGCAGAGCAGCCTAATTGTTGCAGTGCTGGGCAGAGAATGGCTGCAAGTCAG  
AAGGCTGATGCCTGTGGACATGATTCTCATCAGCCTGGGCATCTCTCGCTTCTGTCTACA  
GTGGGCATCAATGCTGAACAATTTTTGCTCCTATTTTAATTTGAATTATGTACTTTGCAA  
CTTAACAATCACCTGGGAATTTTTTAATATCCTTACATTCTGGTTAAACAGCTTGCTTAC  
CGTGTTCTACTGCATCAAGGTCTCTTCTTTCACCCATCACATCTTCTCTGGCTGAGGTGG  
AGAATTTTGAGGTTGTTTCCCTGGATATTACTGGGTCTCTGATGATTACTTGTGTAACA  
ATCATCCCTTCAGCTATTGGGAATTACATTCAAATTCAGTTACTCACCATGGAGCATCTA  
CCAAGAAACAGCACTGTAAGTACAACTGAAAATTTTCATCAGTATCAGTTCCAGGC  
TCATACAGTTGCATTGGTTATTCCTTTCATCCTGTTCCCTGGCCTCCACCATCTTCTCATG  
GCATCACTGACCAAGCAGATAACAATCATAGCACTGGTCACTGCAATCCAAGCATGAA  
AGCGCACTTCACTGCCCTGAGGTCCCTTGCCGTCTTATTTATTGTGTTTACCTCTTACTTT  
CTAACCACTCATCACCATTATAGGTACTCTATTTGATAAGAGATGTTGGTTATGGGTC  
TGGGAAGCTTTTGTCTATGCTTTCATCTTAATGCATTCCACTTCACTGATGCTGAGCAGC  
CCTACGTTGAAAAGGATTCTAAAGGGAAAGTGCTAG

>cattleTAS2R16

ATGACAACCAGCCAACTCTCTGTCTTCTTCATGATTATCTATATGCTCGAGTTCTTGATA  
ATAACTGGGCAGAGCAGCCTGATTGTTGTAGCGCTGGGCAGAGACTGGGTGCAGACTCA  
AAGGCTGCCACCTGCGGACATGATTCTCATCAGCCTGGGCATCTTTTGCTTCTGTCAACT  
GTGGTCATCGATGCTGTACAACCTTTTGTTCCCACTTCCACCCTAATTACAATTTTTGGTAT  
TTCGGGATCATCTGGGAATTTACTAACATCCTTTCCTTCTGGTTGACCAGCTTGCTTGCT  
GTCTTCTACTGTGTCAAAGTCTCTTTCCTCAGCCACCCCGTCTTCCCTCTGGCTGAAGTGG  
AGAATTGTGAGATGGGTTCCCTCGGCTGTTGCTGGGCTCTCTGCTGATTTCTTGTGTGTCT  
ACCATATTTCCAGCTACTAGTTATTACATTGATATTCAATTCATCGCCATGAAGCATTTCC  
CCTAGAAACAGCACCATGCTTGAGAGACTTGAGGCGTTCCTGTGGGATTTTTCCCACT  
GCACAAAGTAGTTGTGTTGGTTATTCCTTTCCTCCTGTTCCCTGGCCTCCACAGTCTTGCTC  
ATGGCCTTATTATCCCGACATCTGAAGCAGATGAAAGACCTTCACACAGGCTGCTCCAA  
CTCCAGCCCAGGAAAGCTCACTCTGCCGCCCTGAGGTCCCTTGCCATCGTCCTCATCTTGTT  
CACCTTTTATTTTCTCACCGTGCTCCTCTCCATATTGGATGTCCTATTTAATAAAGAGTCC  
TGTTCTGGGCCTGGGAAGCTATCATCTATGCATTAGTCTCTATTCACTTACTTTACTA  
ATGCTGAGCAGTGTCAAAGTACAAAGAGTTTTAAAGGCAAGGTGCTGGAGCCTAGAAG  
CTGCCTGA

>elephantTAS2R16C

ATGCCCATCCAACTCACAGTCTTCTTCATTATCATTTATGTGCTCCTGTCTTTGACAATCA  
TTGTGCAGAGCAGCTTAGTTGTTGCACTGCTAGGCAGGGAGTGGGTGCGGGTCAAAGA

CTGTCACCCGTGGACATGATTCTCACCAGCCTGGGCATTTCCCACTTCTGTTCGGCAGTGG  
GCCTCAATGCTGTACAACCTTTTGTTCCCTACTTTGATCCTAATTTTCGTATTTTGGTACTCAT  
CAGTCATCTGGGACTTTGCTAATAATGCTACATTTTGGTTCACCAGCTTGCTTGCTGTAT  
TCTACTGCGTCAAGGTCTCTTCCTTCACCCACCCCATCTTCCTTTGGCTGAAGTGGAGAA  
TTTCAAGATTGGTTCCTCGGCTGTTGCTGGGTTCTCTGCTGGTTTCTTGTGTGACAATCAT  
CCCTTCAACAGCTAGGAGTACACCCAGTTTCAGATCGCCACGGAGAATCCCCTAGCA  
ACAGCACTGTGACTGACAGACTTAAGATAATCCATCTGTATGTTAGCCTGCCTCAGCAA  
ATGGTTACGTTGATTATTCCTTTCCTTCTGTTCCCTGGCCTCCACCACCTTGCTCATGTCCT  
CACTCTCGCAACACTTGGAGCAGATGCAAGACCGCAACACTGGCCACTGCAACTCCAGC  
ATGAAAACACTCCACAGCCCTTAGGTCTCTTGCCGTCTTCCTTATCTTCTTTACCTCTT  
ACTTTCTGACCTTATTTGTCTCCCTTTTAGCTGTCCTGTTTGAGAAGAGGTCCTGGTTCTG  
GGCCTGGGAAGCTGTCATCTACACTGTAAGCTGTATTCATTTCACTTCACTGATGCTGAG  
CAGCCCTGCATTGAGAAAGTTTCTAAAGAAAGGGCACTGA

>opossumTAS2R705

ATGCCCAACCCAATTACTCTCTTCTTCATGATCTTCTTTCTCCTAGAATCTGTGATTGCAA  
TTGTAGAAAACAGTTTCATCTTCATGATACTGGGCAGGGAGTGGATGCGATGTCGGACC  
TTGCCCCCTGGTGATATTATCCTGGCCAGCCTGGGCATCTCCCGCTTCTTTCTGCAGTGG  
ATGTCAATTTTTAGTAACTTCTTCACTTATTTCTTCCCGCTTAAACTAAGTGTATACTTTG  
GTACTTTTTGGACTTTTAGTAACATGACCACTTTCTGGTTCACCACTTGCCTTGGCGTTTT  
CTACTGTGTGAAAATTTCTGCTTTCACTCACCCAGTCTTCCTTTGGCTGAAGTGGAGAAT  
TCCCCAAATGATCCACTTGTTCCCTGTTTTGCTCCCTATTGACATCCATTCTTTTAACTACC  
CCACAAATTTTAAACAACCTTTTAACTTTCCAAGTGAAAGTTCCTGGGAATTCCTCAGAA  
AAGACCATTTTGAAGATAAGATGTGTGCATACAGGATACATTATTTTCATGCCTATGCA  
ATTGTTTATTTTGTACTTCCCTTTCCTCTTCTTCTTAGTCTCTATCATCTTCCTCATTCCA  
CCCTGTGCCGACATTTGGGGAAGATGCAGCACCATAGCTCTAGTCTTCAAGATCCAAGT  
ATGCAGGTCCATATCACAGCCCTAAAGTCCCTTTTCTTCTTTCTCATCCTCTACACATCAT  
ACTTTCTTCCCTCTGATCATCAGCACCATCATACCCATTTTCAGTAAGCAGTTCTTGGTTTTG  
GGTAAGGGAAGTAGTGACCTATGCTGGCATCTCCATCCATCCTGCCTTCCTGATCCTGAA  
TAGTCCCAAACCTGAGAGGGGCTCTGAAGAAGATATTTTCATGTCCAGAGGCTGCATAA

>Tasmania-devilTAS2R705

ATGCCCAGCCTCCTCATTGTTTTTTTCATGATCTTTCTCCTGGAGTCTGTGGTAGAAATTA  
TAGGAAATGGTTTTTCATCATTGTAGTGCTGGGCAAAGAGTGGATGCGATGTTGGACCCTA  
ACCCCTGGTGACATGATTCTGGCCAACCTGGACATCTCCCGTTTCTTTCTACAGTGGACA  
GCAATTATTAGTGACTTCTGCTCATATTTCTTCTCACCTAGCAAAGGTGTACTTTTGGGA  
ATGATGTGGAATCTTCCCTAATGTAACCACATTCTGGTTCACCACCTTGCTTGCCGTTTTCT  
ACTGTGTGAAACTTTCTTCCCTTCAATCACTCAATCTTCTTTTGGCTGAAGTGGAGAATTT  
CCCGATTTGTCCCTTGGTTACTGTTGTGGTCCCTAGTGCTATCCATTTTGATATCCATTCT

GTCTTTTGTAAAAGGCTATCACGTTTTGCAATTTCCAGTCATTGGGAATTA ACTCGGAAAA  
GACCATTTTGAATGCTAATATACGTGCATTCCAGATACATTTTTTCTTGCCTCTGCAACT  
ATTTATTTTGTTAATTCCTTTCTTTGTTTTCTGGTTTCCATCATCCTGCTCACTTCCTCCC  
TGTGCCAACACTTGGGGAACAAGGAGCACCATAGTGCTGATCCTCAGGATCCAAGGATG  
CAGGTCCACATTATAACCCTGAAATCTCTTTTCTTTTTTCTCATCCTCTTTACATCATAACC  
TTTTGCCTTTGATCATCACTACCACAGCACCTATATCAGTTTGCAGTTCTTGGTTTTGGAT  
AAGGGAGGTAGTGACGTATGCTGGTATCTCCATCCATCCTGCTTTCCTAATCCTGAACAC  
CTCAAAACTAAGAAGAGCTCTGAAGAAGATGCTTCATGATCCAGAGTCTGCATAA

>quollTAS2R705

ATGCCCAGCCTCCTCATTGTTTTTTTCATGATCTTCTTTCTCCTGGAGTCTGTGGTAGCAA  
TTATAGGAAATGGTTTCATCATTGTAGTGCTGGGCAGAGAGTGGATGCGATGTTGGACC  
CTAACCCCTGGTGACATGATCCTGGCCAGCCTGGGCATCTCCCGTTTCTTTCTACAGTGG  
ACAGCAATTATTAGTGA CTTCTACTCATATTTCTTCTCAACCAGCAAAGGTGTACTTTTG  
GGAATGATGTGGAATCTTCCTAATGTAACCACATTCTGGTTCACCACCTTGCTTGCCGTT  
TTCTACTGTGTGAAACTTTCTTCCTTCAATCACTCAATCTTCTTTTGGCTGAAGTGGAGA  
ATTTCCCGATTTGTCCCTTGGTTACTGTTGTGGTCCCTAGTGCTATCCATTTTGATATCCA  
TTCTGTCTTTTGTAAAAGGCTATCACCTTTTGAATCTCCAGTCATTGGGAATAACTCGG  
AAAAGACCATTTTGAATGCTAATATACGTGCATTCCAGATAAAATTTTTTCTTGCCTCTGC  
AACTATTTATTTTGTAAATCCCTTTCTTTGTTTTCTGGTTTCCATCATCCTGCTCATTTCC  
TCCCTGTGCCAACACTTGGGGAACATGGAGCACCATAGTGCTGATCCTCAGGATCCAAG  
GATGCAGGTCCACATTATAACCCTGAAATCACTTTTCTTTTTTCTCATCCTCTTTACATCA  
TACCTTTTGCCTTTGATCATCACTACCACAGCACCTATATCAGTTTGCAGTTCTTGGTTTT  
GGATAAGGGAGGTAGTGACATATGCTGGTATCTCCATCCATCCTGCTTTCCTAATCCTGA  
ACACCTCAAAACTAAGAAGAGCTCTGAAGAAGATGCTTCATGATCCAGAGTCTGCATAA

>wallabyTAS2R705B

ATGCCCAGCCTACTCATTGTCTTCTTCATGGTTATCTTTCTCCTGGAGTCTATGGCAGCA  
ATCATACAAAATGGTTTCATCATCACAGTGCTGGGCACAAAGTGGGTGCAATGTTGGAC  
CTTGCCCCCTGGTGACATGATCCTGCTCAGCCTGGGCATCTCCCGCTTCTTTCTACAGTG  
GGCGGCAGTTCTTAGCAACTTCATCTCATATTTCTCCCCAGTTAACAGAAGTCCATACCT  
TGGCATTCTTCTGGAGTTTTACTAATGTGACCACATTCTGTTTCACCACCTGCCTTGCTGTT  
TTCTACTGTGTGAAAATTTCTTCCTTCACTCACCCAATATTCCTCTGGCTGAAGTGGAGA  
ATTTCCCGATTTGTCCCCCGGATACTGTTATCATCCCTAGTGATATCCAATTTGATAATC  
ATCCCATCTGTTGTAAAGATCTATTTTGTTTTCCCATTGCCAGTCACTGGGAATTA CTCA  
GAAAAGACA ACTTTGGATGATATGAAACTTGCATTTTACAAGCAATTTTTAATGCCTCT  
GCAAGTGTATTTTGTAAATTTCTTTTCTTCTTTCTGGTTTCCCTCATCTCCCTCATT  
CTTCCCTGTGCCGACACTTGGGGAACATGCAGCATTATAGTGCTGGTCCCTCAGCAACCA  
AGTACACAGGTCCATGTTACA ACTGTGAAGTCATTTTCCCTCTTTCTCATCCTCTGCACA

TCATATGTTCTGCCTTTGATCTTCACCCTCACAGCACCTCACTCCACTTCAGTTTTTAGCC  
CTCAGTTTTGGGTATGGGAGATATTGACCTATGCTGGCATTTCATCCATCCTGCCTTCC  
TGATCCTGAACAGCTCAGAAGCTGAGAAGGGCTCTGAAGAAGCTGCTGCATGACCACGA  
AGCTGCATGA

>koalaTAS2R705C

ATGCCCAGTCTACTCATTCTCTTTCATGATCTTCTTTCTCCTGGAGTCTACAGTGGCAA  
TTGTAGAAAATGGTTTCATTATCGTAGTGCTGAGCAGGGAGTGGATGCGATGTTTCGACT  
CTGCCCCATGGTGACATGATCCTGGCCAGCCTGAGCATCTCCCGCTTCTTTCTACAGTGG  
GCAGCAGTTCTTAATGATTTCTTCACATATTTCTCCCAAGTGATGGAAGTCTATACCTT  
GACATTTTCTGGAATTTTACCAACACGACCACATTCTGGCTCACCACTTGGCTTGCTGTT  
TTCTACTGTGTGAAAATTTATCCTTCACTCACCAATCTTCCTCTGGCTGAAATGGAGA  
ATTTCCCGATGTGTCCCCAGCTACTGTTGTGGTCCCTACTGATATCTACTTTGATAATC  
ATCTCATATTTTGTAAGACATATCCTATTTTACAACCACCAGTCACTGGGAATTACTCA  
GAAAAGACCACTTTGGAAGATATGAGACGCAAATTACATATGCATTTTTTCTTGCCTCTC  
CAAATGTTTATTTTGTTAATACCTTTCTTCTTCTCCTGGTCTCCATTATCTTGCTCATTTC  
CTCCCTGTACCGACACTTGGGGAACATGCAACACCACAGTGCTTGTCTCAGGATCAGA  
GTATGCAGGTCCATATTACAACCGTGAAGTCATTTTTCTTCTTCTCATCCTCTGTACATC  
ATATGTTCTGCCTCTTATCATTACCCTCATAACAGTTTACCCTTTTTTCAGTTTGTAGCTCT  
CGTTTTTGGGTATGGGAGGTATTGACCTATGCTAGCCTCTCCATTCATCCTGCCTTCTGT  
ATCCTGAACAACCTCAAAACTGAGAAGGGCTCTGAAGAAGATGCTTCATAACCCAGAGG  
CTGCGTAA

>platypusTAS2R801

ATGGACCCATCGTGCATCACGTACCTGGTGGTCTTAGTAGCCGAGTTCCTGGTTGGGAT  
GTCGGTCAACGGGCTCATCGTGGGAGTGAGCTGCACCCACAGGTACCGAAGAAGGAGA  
ATGACACCGTGTGACCTCCTTCTCACCAGCTTGGGGTTCTCCAGGATGTGCCTGGAAGT  
GTTTTACTTCACGCCTCCATCGAGACGTTCTGTTCTGTTCTGAAGAGTTACCCGAACAGCACG  
CTGCAGTATTCCTTCTGCATGTTTCATCAACCAGGTGGATCTCTGGTTCTCCACCTGGCTC  
AGCGTCTTCTACTTCGTGAAGATCACCACTTCACCCACCTCTCTTCTCCTCTGGCTGAAG  
CGGAGGATCTCCGGGCTGGTGGCCCTGGTTGCTCCTGTGTTCTCTGCTCTGTTCCGTCGTC  
ACCAACTGCCCGTTATTAAGGAAGCGGACCGGAAACGGGCTCGCCGGCAATCTCTCCGG  
CGGCCACCCGGAACCGGGAAGCGCTCAGGTGGTCGTTAATCCGCTTTCGGGCCAATCC  
TGATTCTGCCCTTCCCGATCTTCTCACCAGCTTTCTCCTGCTGATGGTTTCTCTCTGCAG  
ACACGTCAGGCGCATGAGACGCTCGGGCACCGGCGCCCGGGTCCCAGCGTGGCGGCC  
CACTCCGGGGCCATCAAGACCGTGTCTTCTTCTCCTCCTCTTCTGCAGCTCCTATTTCTGTG  
CCATGACTCTGTTGTGTAGCCGAACCTTCCCATAGAAAGCCTCTTACCACCTCTCTGTG  
AAAATATTCTTTTAGCGTGTCTACCGGGCACTCCGTGTGCTGGTTCTGGGAAATCCCAA

GATGAAGTGGGCGGGGAAACGGCTTCTCACCTGCCCCGGGGCCGGCCGAAGTCGAGGG  
GCTTCGTCTCTTCAGGGCCTCAGACTTAAGCCCTGA

>platypusTAS2R802

ATGCCCTCTGTTGTGGCGAAGAGACTGGTCATAGCTGTGGCCGTGGTCGAGCTGGTGTC  
CTCCCTGGGGATAAATGGCTTCATACTGGCCGTGAATGTCCTGGACTGGGTGAGGGGAA  
GCCAGCTGACCTCCTGCGACCTGCTGCTGAGTGGCCTTAGCGGCTCCCAGCTCTGCCGG  
CAGTGGTTCCTGATGCTGGACTGCTTCACTGTCTGCGGGTACCTGACCATGTCCCCGCTG  
GAGGATTGGGCCACCACTGTACTCTGGCAGCTCACGAGCCAGGCCAGCCTCTGGCTCGC  
CGCTGCCTCAGCCTCCTCTATTTCTGAAGATTGGCACCTTACCCACCCTGGGTTCAT  
GTGGCTGAAATGCAGGGTGCCAGGCTGGGGCTGCAGCTGCTTCTGGGCTCCTTGCTGG  
TTTCTGCCGTCTCCACCCTCACCCTGCTGCTGGTGGCCTCCAAGGCAGCACCTGGGGAG  
CCTTCCAGGGAGAGTCCAGGAACTTCTCATACTGCTAGACTGGAGAAGGAAGTCAAAC  
ATCTACCTCCCTCTGCTCCTGAGCCTGCAGTTCCTTCTGCCGCTGTCCATCTTTCTGGTCT  
CCATTTCCCTGCTGGTCAGGTCCCTGCTGAGACACGTCAGGCACATGGGCTTCCTCGCCA  
CCGGCCATGGGGACCCAGCACCAAGGCCACATCACTGCCACCAAGACTCTGGTGGCC  
TTCCTCTTCTTCTACCTTCTGTTTGTGATCACCAACTTCCTTTTATTCGCCCTGGACTACC  
CCAGCAGCCCAGGAGCATTTTCCACC<sub>A</sub>AccTGGtGCTCATGGGCGCCTGTGCCTCGGG<sub>A</sub>AA  
TGG<sub>c</sub>ATCTT<sub>C</sub>ctgGT<sub>c</sub>CtGGG<sub>t</sub>AACAG<sub>C</sub>aAgCTGAGGAAGGCAGCAGAGGTACTGGTCACAT  
GGGCCACCAGCCCCCTGCGGAGACCCTTGGGGGTGACAGTGGCAGCGGCTCCATCCACT  
GCCTAA

>platypusTAS2R810\_hap1

ATGGCGGCCCCACTGACCGTGTTCTTTTTCAGCCTTTACCTGCTGGTGCTGCTGATGGGG  
ATCCTGGGTGACGGATTCATCGTGGGACTGTTGAGCAGAGAATGGGTTCGAAGCAGGG  
AGCTGCCTCCGTGCGACAAGATCGTGGCCAGTCTGGGAGCCTCCAGGTTTTTCATGCATT  
GGATGTCAACCCTGAATGGGATCTGCATCCTGGTCTCCCCAGATCATATTGTTCCACTA  
ATGTCTTCTACAGTGGGATCCTCTGGATCCTTCTGAACTTGTTCTCCTTCTGGTTTGCTGC  
CGGGCTCAGCGTCTTCTACTGCTTGAAGATCGCCACTTTCACCCACCCACTCTTCCTCTG  
GCTGAAGCAAAAGATTTTCGAGGATGGTGGCCGTGGCTCCTCATAGGTTCTATACTGGTTT  
CCTGTGTCTCCACTCTACCCTTCATTATCCATTACAGCACTAATGACACCTGGAAGAACA  
AGTCAAGGAACAGCACCGAGACTGTGGCGAAGACCTTCCAGTCTCTAAAAATCTTGCCG  
TTGATCTTCATCCCATTGTGTGTCCCATTCTCCTGCTGCTCATCTCCTCCGTCCCTGCTGA  
CCACCTCCCTCTGGAGACACCTGAAGGCCATGCAGCATCACGGCCCCGGCCTGCAGGAC  
TGCAGCACCAAGGCTCACACCTGTGCGCTCACAACGCTGGCCTCCTTTCTCTCCTTCTAC  
GTTTGGTACTTCATCTCTCTGATCGTCACCTCGACCTTGACCAATTCATTTGACAGTCCTT  
GGTTATGGCTAGTCCAGCTCTTATCTTTCTTGGGGACAACGTGCCACCCCGTCTTGCTGA  
TATGGAGCAACCCCAAAATCCGGGGGGGCCTAGAGAGGGGACTCCATTACATAACCAGC  
CTGCCAGACACCGTGTGGGACAGCATAA



>platypusTAS2R811\_hap1

ATGGAGGACGCCCTGACCATCTTCTTTTTTCAGCCTTTTCCTGCTGGAGGTGCTGGTAGGG  
ATCCTGGGTGATGGATTACTCGCGGGGCTGTTTGGCAGGGAATGGGTCCGACGCAGGAA  
GCTGCCTCCGTGTGACATGATCGTGGCCAGTCTGGGAGCCTCCAGGTTTTTCTTGCTGTG  
GGTGTGATGCTGAATGGAATTTGCCTCGAGGTCATCCCCAAATTTTATTATTCCCCCAT  
TATCTTCTATAGCAGTTTTGTCTGGGCCCTTTTGAACCTGTTCTCCTTCTGGTTTGCGGCG  
GACTCAGCATCTTTTATTGCTTGAAGATCGCCACCTTCACCAACCCACTCTTCCTCTGG  
ATGAAGCAAAGACCTCTGGGATGGTGCCCTGGCTCCTCTTAGGTTCCGTATTTGTTTCC  
TGTGTCTCGACTTTCCCCTGCATTATCTATTACAGCATTAAAGCCCCCTGGATGAACAAC  
TCAGAGAACGGCACTGAGGCTGTGTTGAAGACCTTCAGTCACTCAAATCATGCCTGT  
GATCTTCATCCCCTGAGTGTCCCGTTCCTCCTGCTCCTCATCTCCTCCATCCTTCTGACC  
ACCTCCCTCCGGAGACACCTGAGAGCCATGCAGCATCACGGCCCCAGCCTGCAAGACTG  
CAGCACCAAGGCTCATGCCCATGCACTTGCAATGCTGGCCTCCTTCCTCTCCTTCTATGT  
TTGGTACTTCATCATTCTGATTGTCACCTCGACTACGGCCATTCCATCTGGGAGTCCCTG  
GTTCTGGCTATTCCaGGTGATAACTTTCTTGGGGACAACGTGCCACTCCCTCTTGCTGAC  
GTGGAGCAACCCCAAAATCCGGGGGGCTTTGGAGAGGGGGCTGCGTCaCATCCAGCCT  
GcCAGAcacCGTATGGGacAGCATAA

>platypusTAS2R812\_hap1

ATGGCAGCCCCCTGACCATCTTCTTTTTTCAGCCTTTATCTGCTGGTGCTGCTGGTGGGG  
ATCCTGGGTGACGGATTCATCGCGGGGCTGTTGGGCAGCGTGTGGGTCCGACGCAGGAA  
GCTGCCTCCGTGCGACATGATCGTGGCCAGCCTAGGAACCTCCAGGTTTTTCTATTGTT  
GTTGTCGATGCTGAATGGGATCTGCATCTTGGTCTCCCCCAgACCATATTACTCCCCATTT  
CTCTTCTACTGCATGTTTTTCTGGGACCTTTTGAACCTGTTCTCCTTCTGGTTTGCGGCGG  
GGCTCAGCGTCTTCTACTGCGTGAAGATCACACCTTCACCCACCCATTCTTCCTCTGGC  
TGAAGCAgAAgATCTCGGGGATGGTGCCCTTGGTTCCTCATAGGTTCCATATTGGTTTCT  
GTGTCTCCACTTTCCCCTTCATTATCCACAACAGCGCTAACTCCACCTGGTGTAACAAC  
CTGGGAACAGAACTGAGGTTGACTGGAAGACCTTCAGTCACTCAAAGTCTGGTTCATG  
ATCTTCATCCCAATGAGTGTCCCAGTCCCTCCTGCTCCTCATCTCCTCCATCCTGCTGGCCA  
CCTCCCTCCGGAGACACCTGAGGGCCATGCAGCACACGGCCCCGGCCTGCAGGACTGT  
AGCACCAAGGCTCACAGGCGTGCCTCGCATCGCTGACCTCCTTACTCTCCTTCTATGTT  
TGGtACTTCATCTCTCTGGTCTTAACCTCGGCCTTCACCATTCCATTTGACAGTTCCTGGA  
TATGGCTAGTCCAGCTGGCGACTTTCTTGGGGACAACATGCCACCCTCTCTTGCTGACGT  
GGAACAACCCCAAAATCCGGCGGGCCTTAGAGAGGAGGCTGCATCACATCTCAGCCTG  
CCAGACACCGTGA

>platypusTAS2R813A

ATGGAGGCCTCACTGAACATCTTCTGTTTTTCAGCCTTTACCTGCTGGTGCTGCTGGTGGGG  
ATCCTGGGTGACGGATTCATCGCGGGGCTGTTGTGCAGCAAGTGGATCCGAGGCAGGAA

GCTGCCTCCATGCGATATGATCTTGGCCGGTCTGGGAGCCTCCAGGTTCCCTCCTGCTGTG  
GGTGGCAATGCTGAATGGGATCCGTGCTTTTATTTTCTCCGAAGTGTACCAATACCATAT  
TATTTTCTCCTTCTTTGGCTTTTGGGAGTAGTGCTGGGCCTTGTCTCCTTCTGGCTGGCT  
GCCGGGCTCAGCGTCTTCTACTGTGTGAAAATCTCGACCTTCACCCATCCCCTCTTCCTC  
TGGCTGAAGCAAAGGATTTTCGGGACTTGTGCACTGGTTCCTCATTGGCTCCATGCTGGCT  
TCCTGTGTCCCCATTATCCCAGTCATCATTGGCTACCACATCATCTCTGTCCAGAAGATT  
GCTTCAGGGAACAGCACCAAGGTTGAGGGGACGACCTTCCAGTCACACTATACTAAT  
CATGACGTTTATCATATTTTGTGTCCCCTTCTTCCTGCTCCTCAGCTCCTCCATCTTTTGT  
ACCGTCTCTCTTCTGAGACACCTGAGGGCCATGCAGCACCACCACCTAAACTTGCAGGA  
CTGCGGCACCAAGACTCACACCCGCGCACTAGCAACACTGGCCTCCTTCCTCTTCTTCTA  
CGTTTTGTACTTTGTCTTCCTGATCTTCACCTCGGCCTTGAATTCTCCATTTGACAGTCCC  
TGTTGTGGCTGCTCCAGATAGTTACTTACTCGGGACCAATATGCCACGCCTTCTTGCTG  
ATGTGGAGCAACCCCAAATCTGGGGGGCCTTAGAGAAGGGCCTGCAGCGCGTCCCAG  
CCTGTCTGACACCGTGTGGGACAGCATAA

>platypusTAS2R813B\_hap1

ATGGAGGCCCCaCTAACCaTCTTCTTtTTCAGCCTTTTCCTGCTGGTGCTGCTGGTGGGGAT  
cCTGGGTGATGGATTcATTGTGGGGTTGTTGGTCAGCGAGTGGATCCGACGCAGGAAGC  
TCCCTCTGTGTGACATGATTGTGGCCGGTCTGGGAGCCTCCAGGTTCCCTCCTGTTGTGGG  
TTGCAGTGCTGAATGGGATCTGTGCCTTTATCGTCTCAAATTTTACCAATACAGTATTT  
TCTTCATCTTCTTTGCCTCCCTGGCAGCAATACTGACCCCTGTCTCTTTCTGGATGGCTGC  
CGGGCTCAGCTTCTTCTACTGTGTGAAAATCTCGACCTTCACCCATCCCCTCTTCTTCTGG  
CTGAAGCAAAGGATTTTCGGGACTGGTGCCCTGGTTCCTCACTGGCTCCATGCTGGCTTCC  
TGTATCCCCATTATCTCATTcACCACTGGCTATAAGTTTATCTCCATCTGGAAGACTGAC  
TCAGGGAACAGCACCGAGGTTGAGGGGAAAACCTTCCAGTCACATTATATCTTATTCTGT  
GACACTTATCACATTATGCGTCCCGTTCTTCCTGCTCCTCGTCTCCTCCATCCTGTTGACC  
ACCTCCCTCCAGAGACACCTACGAGCCATCCAGCACCACGGCCCCAGCCTGCAGGACTG  
CATACCAAGGCTCACACCCGTGCTCTCGCAATGCTGGCCTCCTTCCTCTTCTTCTACAT  
TTTGTATTTcATCTCCCTGATCTTCACCTCGGCCTTGAtTGTTCCATTTGGGAGTCCCTGGT  
TGTGGCCAGTACAGACAGTTACTTACTCGGGCCCAATATGCCACACCTTCTTGCTGATGT  
GGAGTAACCCCAAATCTGGAGGGCcTTAGAGAGGGGTCTGCAGCGTGTCCCAGCCTGT  
TTGAGACCATGTGGGACAGCATAA

>echidnaTAS2R802\_hap1

ATGATGCCCTCTGTTGTGGCAGAGAGACTGGTCATGGCTGTGGCTGTAGCCGAGCTGGT  
GTCCACCCTGGGGATAAATGGCTTCATACTGGCAGTGAACATCCTGGACTGGGTGAGGG  
GAGGCCAGGTGACCTCCTATGACCTGATGCTGAGTGGCCTTAGCGGCTCCCAGCTGTGC  
CGGCAGTGGTTTCTGATGCTGGATGCCTTCATTGCCTCTGGGTACCTGACCATGTCCCCA  
CTGCAGGTTTGGGCCACCACCGTGCTCTGGCAGCTTACGAGCCAGGCCAGCCTCTGGTT

CGCCACCTGTCTCAGCCTCCTCTATTTCTGAAGATCGGCACCTTCACTCACCTGGCTT  
CTTGTGGCTGAAATGCAGGGTGCCAGGCTGGGGCTGCAGCTGCTGCTGGGCACCTTGC  
TGGTTTCTGCCATCTCCACCCTAACCTGCTGCTGGGGGCTCCAAGGCAGCACCTGGG  
GAGCCTTCTACGGAGAGGTCAGGAACTGCTCGGACCTACCAGACAGCAGAAGGATATT  
GGACTTCTACCTCCCTCTGCTCCTGAGCCTGGAGTCCCTCCCACCCCTGTCCATCTTTCTG  
GTCTCCATTTCCCTGCTGGTCAGCTCCCTGCTAAGACATGTCAGGCACATGGGCCACCTC  
GCCACCGGCCATGGGGACCCCAAGGCCACATCACCGCCACCAAGACTCTGGT  
GGCCTTCTTCTTCTACCTTCTGTTTGTGATTGCCAACTTCCTTGTGGTCACTCTGGAC  
TGCCCCAGCAGCTCAGGGGCATTCTCCACAGGCCTGGTGCTCATGGGTGCCTGCGCCTC  
GGGAAACGGAATTTCTCTGGTCTGGGTAACAGCAAGCTGAGGAAGGCAGCAGAGGGC  
CTGGTCACATGGGCCACCAGGACCCTGCAGAGATCCTTTGGGGTGGCAGTGGCAGCAGC  
TCCATCTGCTGCCTGA

>echidnaTAS2R813\_hap1

ATGACGGCCCTACTAAATATCTTATTTTTTCAGCCTTTTCTGCTGGAGCTGCTGGTGGGG  
ATGCTGGGTGATGGATTCATCGCGGGGCTGTTGGGCAGCGAGTGGATCCGATGCAGGAA  
GCTCCCTCCGTGCGACATGATCGTGGCCAGTCTGGGAGCCTCCAGGTTCTCCTGCTATG  
GGTGGCAATGCTGAATGGGATCTATGCCTCTATCTTCCCCAAATTTTATGAATGCAGTAT  
TTTCTTCTCTTCTTTAACTCCCTGGGAGCAATATTGAGCCTTGTCTCCTTCTGGCTGGCT  
GCCGGGCTCAGCATTTTCTACTGTGTGAAAATCTCTACCTTCACCCACCCCTCTTCTCT  
GGCTGAAGCAAAGGATTTTCAGGACTGGTGCCTGGTTCCTCACTGGCTCCCTGCTGGCTT  
CCTGTGTCACCATTATCCTGATCACCCTGGCTATAGCATTATCCTCACCCAGGAGAATG  
CCTCAGGGAAGTGCCTGAAGTTGAGGGGAAAACATCCCGGTCGCTTTATATCCTTTCC  
ATGACATTTATCATGTTGTGTGTCCCCTCCTCCTGCTCCTCATCTCCTCCGTCCCTGCTGA  
CCACCTCCCTCCGGAGACACCTGAAGGCCATGCAGCACCATGGTCCCGGCCTGCAGGAC  
TGCAGCACCAAGGCTCACACCCGTGCCCTCGTAATGCTGGCCTCCTTCTTCTGCTAC  
GCTTTGTACTTTGTCAGCCTGATCTTCATCGCAGCCCTCATTATTCCATTTAACAGTCCCT  
GGatATGGCTGATCCAGATGGTTACTTACTTAGGACCAATAAGCCACACCTTCATGCTGA  
TATGGAGCAACCCCAAATCCGGGGGGCCCTGGAGAGGGGGGGCCTGCAGCGTGTCCC  
AGCCTGTCTGACACCGTGCTGGATGGCATAA

>echidnaTAS2R814\_hap1

ATGGCGGCCCCACTGAAGGTCTTCTTTTTTCAGCCTTTACCTGCTGGAGATGTTGGTGGGG  
ATCCTGGGAGACGGATTCATCGTGGGGCTGTTGGGCAGCAAGTTGGTCCGACGCAGGAA  
GCTGCCTCCGTGCGACATGATCGTGGCCAGTCTGGGAGCCTCCAGGTTCTTCTGCTGTG  
GATATCAATGCTGATAGGAATCTCGTTCATGGTCTTCCCCAAATCTTATTCCTCCTCCAT  
TCTCTTTTCTTCTTTCAGGTCCATATGGATCCTTCTGACCTCTGTCTCCTTCTGGTTTGTG  
CCAAACTCAGCCTCTTCTACTGCGTCAAAAATCGCCACCTTCACCCACCCCTCTTCTTCT  
GGCTGAAGCAAAGATATTGTGTTTGGTGGCCAGGCTCCTAATGGGCTCCATGTTGGCT

TCCTGTGTCTCTGCTCTCCCCTTAATCATCCACTGTGACACTAATGCCACTTGGAGGAAT  
GGCTCAGGGAACGACACTGAGGCTAAAGAGCAGATCTTCTCTTTATACTATGTCCTGCC  
TATGATGTTTATCATGCTGGGTGTCCCATTCCTCCTGCTCTTCACTTCCTCCGTCCTGCTG  
ACCATCTCCCTCCGGAGACACCTGCGAGCCATCCAGCACACGGCCCCGGCTTGCAGGA  
CTGCAGCACCAAGGCTCACACCCGCACACTCGCAGTGTTGGCCTCCTTCCTCTTCCTCTA  
CGTTTGGCACTTCGTCTCTCTGATCTGCATCGGGACTGTAATCGCTGAgAGGAACATGTC  
CTGGGTGTTGCTAACCCAGATGGTGACTTTCTTGGGGCTGATGTGCCACCCGTTTCCTGCT  
GATCTGGAGCAACCCAAAATGCGGGGAGTCTTGAgAGAGGGcTGCAGCGAGTCCTGA  
CCTTTCTGAcCATACGTGGGGCAgCATAA

## References

- Buckley RM, Davis BW, Brashear WA, Farias FHG, Kuroki K, Graves T, Hillier LW, Kremitzki M, Li G, Middleton RP, et al. 2020. A new domestic cat genome assembly based on long sequence reads empowers feline genomic medicine and identifies a novel gene for dwarfism. *PLOS Genet.* 16:e1008926.
- Fierro F, Giorgetti A, Carloni P, Meyerhof W, Alfonso-Prieto M. 2019. Dual binding mode of “bitter sugars” to their human bitter taste receptor target. *Sci. Rep.* 9:8437.
- International Chicken Genome Sequencing Consortium. 2004. Sequence and comparative analysis of the chicken genome provide unique perspectives on vertebrate evolution. *Nature* 432:695–716.
- Johnson RN, O’Meally D, Chen Z, Etherington GJ, Ho SYW, Nash WJ, Grueber CE, Cheng Y, Whittington CM, Dennison S, et al. 2018. Adaptation and conservation insights from the koala genome. *Nat. Genet.* 50:1102–1111.
- Lindblad-Toh K, Garber M, Zuk O, Lin MF, Parker BJ, Washietl S, Kheradpour P, Ernst J, Jordan G, Mauceli E, et al. 2011. A high-resolution map of human evolutionary constraint using 29 mammals. *Nature* 478:476–482.
- Mikkelsen TS, Wakefield MJ, Aken B, Amemiya CT, Chang JL, Duke S, Garber M, Gentles AJ, Goodstadt L, Heger A, et al. 2007. Genome of the marsupial *Monodelphis domestica* reveals innovation in non-coding sequences. *Nature* 447:167–177.
- Mouse Genome Sequencing Consortium. 2002. Initial sequencing and comparative analysis of the mouse genome. *Nature* 420:520–562.
- Murchison EP, Schulz-Trieglaff OB, Ning Z, Alexandrov LB, Bauer MJ, Fu B, Hims M, Ding Z, Ivakhno S, Stewart C, et al. 2012. Genome Sequencing and Analysis of the Tasmanian Devil and Its Transmissible Cancer. *Cell* 148:780–791.
- Rosen BD, Bickhart DM, Schnabel RD, Koren S, Elsik CG, Tseng E, Rowan TN, Low WY, Zimin A, Couldrey C, et al. 2020. De novo assembly of the cattle reference genome with single-molecule sequencing. *Gigascience* 9:1–9.
- Sakurai T, Misaka T, Ishiguro M, Masuda K, Sugawara T, Ito K, Kobayashi T, Matsuo S, Ishimaru Y, Asakura T et al. 2010. Characterization of the  $\beta$ -D-Glucopyranoside binding site of the human bitter taste receptor hTAS2R16. *J. Biol. Chem.* 285:36 28373-28378.
- Schneider VA, Graves-Lindsay T, Howe K, Bouk N, Chen H-C, Kitts PA, Murphy TD, Pruitt KD, Thibaud-Nissen F, Albracht D, et al. 2017. Evaluation of GRCh38 and de novo haploid genome assemblies demonstrates the enduring quality of the reference assembly. *Genome Res.* 27:849–864.
- Thomas A, Sulli C, Davidson E, Berdougou E, Phillips M, Puffer BA, Paes C, Doranz BJ, Rucker JB. 2017. The Bitter Taste Receptor TAS2R16 Achieves High Specificity and Accommodates Diverse Glycoside Ligands by using a Two-faced Binding Pocket. *Sci Rep.* 7:7753.
- Zhou Y, Shearwin-Whyatt L, Li J, Song Z, Hayakawa T, Stevens D, Fenelon JC, Peel E, Cheng Y, Pajpach F, et al. 2021. Platypus and echidna genomes reveal mammalian biology and evolution. *Nature* 592:756–762.
- Zoonomia Consortium. 2020. A comparative genomics multitool for scientific discovery and conservation. *Nature* 587:240–245.
